# Supplementary material for: Effectiveness of COVID-19 vaccines against the B.1.617.2 variant
Source: bioRxiv or medRxiv preprint supplement (doi:10.1101/2021.05.22.21257658), 2021-05-24
Supplement: Supplementary file [file media-1.pdf]

## Supplementary appendix

*Supplementary table 1: Cross-tabulation of S-gene target status and variant as identified by whole genome sequencing*

| Variant                        | S-gene   |          |         | Total   |
|--------------------------------|----------|----------|---------|---------|
|                                | positive | negative | unknown |         |
| No sequencing result           | 356      | 1,574    | 439     | 2,369   |
| B.1.1.7                        | 2        | 5,099    | 278     | 5,379   |
| B.1.1351                       | 19       | 0        | 4       | 23      |
| B.1.617.2                      | 666      | 0        | 56      | 722     |
| P.2                            | 7        | 0        | 0       | 7       |
| B.1.617.1                      | 28       | 0        | 9       | 37      |
| B.1.617.3                      | 3        | 0        | 0       | 3       |
| B.1.525                        | 0        | 12       | 0       | 12      |
| B.1.1.318                      | 9        | 0        | 1       | 10      |
| Low quality (likely B.1.617.2) | 1        | 0        | 1       | 2       |
| Not VOC/VUI                    | 26       | 3        | 3       | 32      |
| Total                          | 1,117    | 6,688    | 791     | 118,157 |

*Supplementary table 2: Cross-tabulation of S-gene target status and variant as identified by whole genome sequencing after dropping non B.1.1.7 or B.1.617.2 variants and reassignment based on sequencing results*

| Variant              | S-gene   |          |         | Total   |
|----------------------|----------|----------|---------|---------|
|                      | positive | negative | unknown |         |
| No sequencing result | 356      | 1,574    | 439     | 2,369   |
| B.1.1.7              | 0        | 5,379    | 0       | 5,379   |
| B.1.617.2            | 722      | 0        | 0       | 722     |
| Total                | 1,117    | 6,688    | 791     | 118,157 |

Supplementary table 3: Odds ratios for detection of B.1.617.2 relative to B.1.1.7 in vaccinated individuals compared to the <14 days post dose 1

| Vaccination status         | Number of cases |           | Ratio B.1.617.2 to B.1.1.7 | aOR              |
|----------------------------|-----------------|-----------|----------------------------|------------------|
|                            | B.1.1.7         | B.1.617.2 |                            |                  |
| Days 0-13 post dose 1      | 551             | 32        | 0.058                      | base             |
| Any vaccine                |                 |           |                            |                  |
| Dose 1                     | 2237            | 272       | 0.122                      | 1.30 (0.82-2.08) |
| Dose 2                     | 81              | 25        | 0.309                      | 1.52 (0.72-3.18) |
| Dose 1 or 2                | 2511            | 322       | 0.128                      | 1.33 (0.83-2.11) |
| Vaccine type (dose 1 or 2) |                 |           |                            |                  |
| BNT162b2                   | 720             | 68        | 0.094                      | 1.10 (0.64-1.90) |
| ChAdOx1                    | 1791            | 254       | 0.142                      | 1.39 (0.87-2.23) |

Supplementary table 4: Matched case control analysis

| Vaccination status   | Number of cases |           | Ratio B.1.617.2 to B.1.1.7 | aOR compared to unvaccinated | aOR compared to <14 days post dose |
|----------------------|-----------------|-----------|----------------------------|------------------------------|------------------------------------|
|                      | B.1.1.7         | B.1.617.2 |                            |                              |                                    |
| Unvaccinated         | 2799            | 534       | 0.191                      | base                         |                                    |
| <14 days post dose 1 | 133             | 21        | 0.158                      |                              | base                               |
| Any vaccine          |                 |           |                            |                              |                                    |
| Dose 1               | 621             | 173       | 0.279                      | 1.19 (0.93-1.54)             | 1.29 (0.74-2.22)                   |
| Dose 2               | 33              | 13        | 0.394                      | 1.44 (0.70-2.95)             | 1.55 (0.65-3.70)                   |
| Dose 1 or 2          | 710             | 198       | 0.279                      | 1.18 (0.93-1.51)             | 1.27 (0.74-2.19)                   |

Matched on Ethnicity, Region, age(10 yrs), week of sample

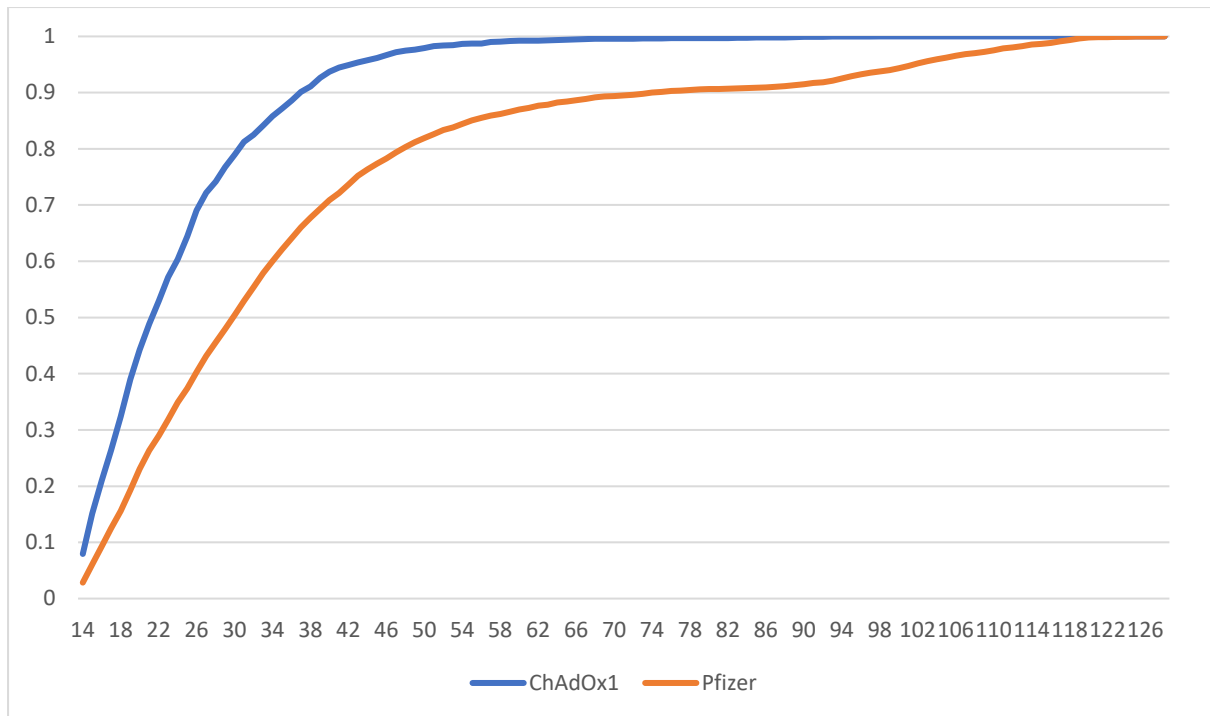

Figure 1: Cumulative proportion of those with 2 doses more than 14 days after dose 2 vaccinated by each time point after the second dose
